# Supplementary material
Source: MDPI journal article supplement (https://www.mdpi.com/1424-8247/17/3/389)
Supplement: s1 [file s1]

# **Cytotoxic and antiproliferative activity of LASSBio-2208 and the attempts to determine its drug metabolism and pharmacokinetics in vitro profile.**

**Raysa Magali Pillpe-Meza<sup>1,2</sup>, Wesley Leandro Gouveia<sup>1,2</sup>, Gisele Barbosa<sup>1</sup>, Carlos A. M. Fraga<sup>1,2</sup>, Eliezer J. Barreiro<sup>1,2</sup>, Lídia Moreira Lima<sup>1,2\*</sup>.**

<sup>1</sup>Laboratório de Avaliação e Síntese de Substâncias Bioativas (LASSBio®), Instituto Nacional de Ciência e Tecnologia de Fármacos e Medicamentos (INCT-INO FAR), Universidade Federal do Rio de Janeiro, Rio de Janeiro 21941-902, RJ, Brazil; [rpillpe@gmail.com](mailto:rpillpe@gmail.com) (R.M.P-M.); [bgiselejf@gmail.com](mailto:bgiselejf@gmail.com) (G.B.); [wleandrogouveia@gmail.com](mailto:wleandrogouveia@gmail.com) (W.L.G.); [cmfraga@ccsdecania.ufrj.br](mailto:cmfraga@ccsdecania.ufrj.br) (C.A.M.F.); [ejbarreiro@ccsdecania.ufrj.br](mailto:ejbarreiro@ccsdecania.ufrj.br) (E.J.B.)

<sup>2</sup>Programa de Pós-Graduação em Farmacologia e Química Medicinal, Instituto de Ciências Biomédicas, Universidade Federal do Rio de Janeiro, Rio de Janeiro 21941-902, RJ, Brazil

\*Correspondence: [lmlima23@gmail.com](mailto:lmlima23@gmail.com) or [lidialima@ufrj.br](mailto:lidialima@ufrj.br)

## **Table of contents**

|                     |   |
|---------------------|---|
| LC/UV Analysis..... | 2 |
|---------------------|---|

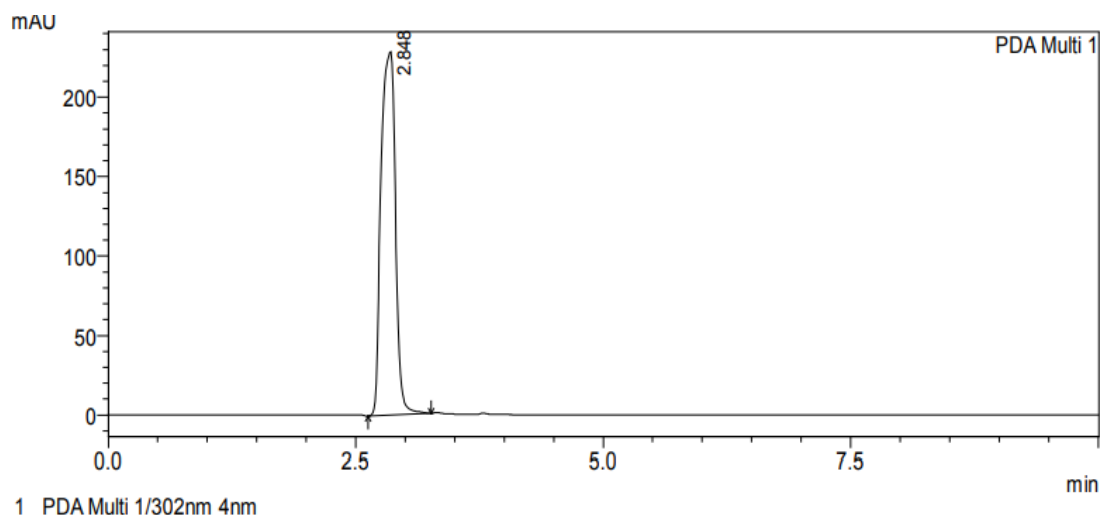

PeakTable

| PDA Ch1 302nm 4nm |           |         |        |         |          |
|-------------------|-----------|---------|--------|---------|----------|
| Peak#             | Ret. Time | Area    | Height | Area %  | Height % |
| 1                 | 2.848     | 2320143 | 228571 | 100.000 | 100.000  |
| Total             |           | 2320143 | 228571 | 100.000 | 100.000  |

**Figure S1** – Purity analysis of the Gedatolisib standard by HPLC. Samples analyzed at 302 nm. Isocratic mobile phase acetonitrile - acidified water (9:1) in 10 min at a flow rate of 1mL/min.

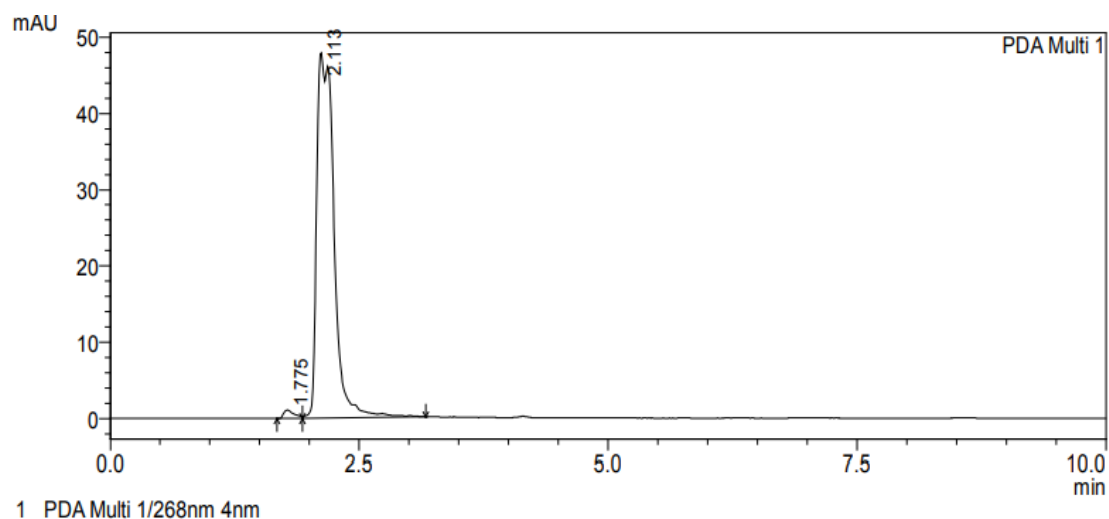

PeakTable

| PDA Ch1 268nm 4nm |           |        |        |         |          |
|-------------------|-----------|--------|--------|---------|----------|
| Peak#             | Ret. Time | Area   | Height | Area %  | Height % |
| 1                 | 1.775     | 7949   | 1072   | 1.372   | 2.192    |
| 2                 | 2.113     | 571440 | 47830  | 98.628  | 97.808   |
| Total             |           | 579389 | 48902  | 100.000 | 100.000  |

**Figure S2** – Purity analysis of the Tubastatin A standard by HPLC. Samples analyzed at 268 nm. Isocratic mobile phase acetonitrile-acidified water (5:5) in 10 min at a flow rate of 1mL/min.

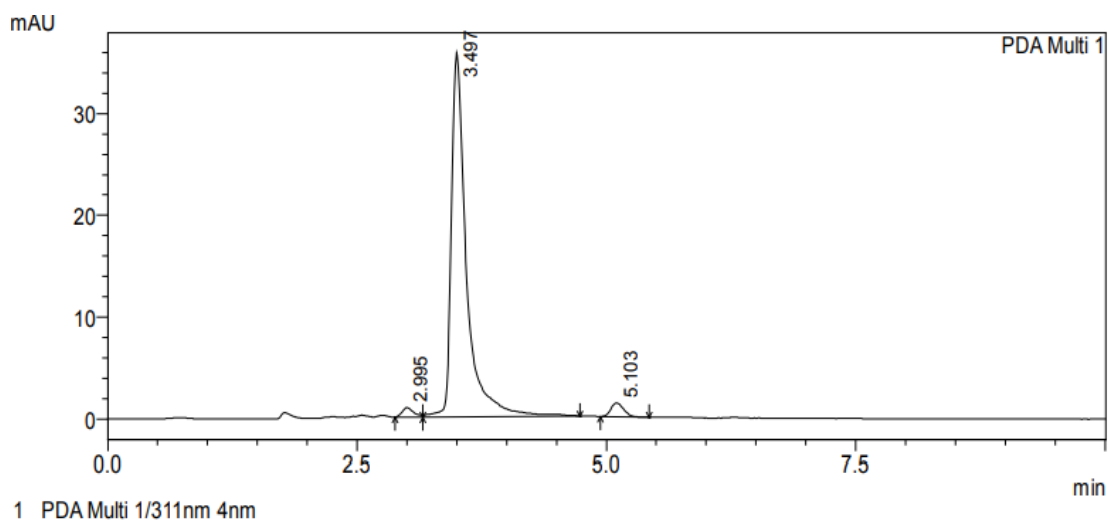

PeakTable

| PDA Ch1 311nm 4nm |           |        |        |         |          |
|-------------------|-----------|--------|--------|---------|----------|
| Peak#             | Ret. Time | Area   | Height | Area %  | Height % |
| 1                 | 2.995     | 7632   | 943    | 1.922   | 2.481    |
| 2                 | 3.497     | 377472 | 35726  | 95.052  | 93.973   |
| 3                 | 5.103     | 12016  | 1348   | 3.026   | 3.546    |
| Total             |           | 397120 | 38018  | 100.000 | 100.000  |

**Figure S3** – Purity analysis of the compound LASSBio-2208 by HPLC. Samples analyzed at 311 nm. Isocratic mobile phase acetonitrile-acidified water (5:5) in 10 min at a flow rate of 1mL/min.

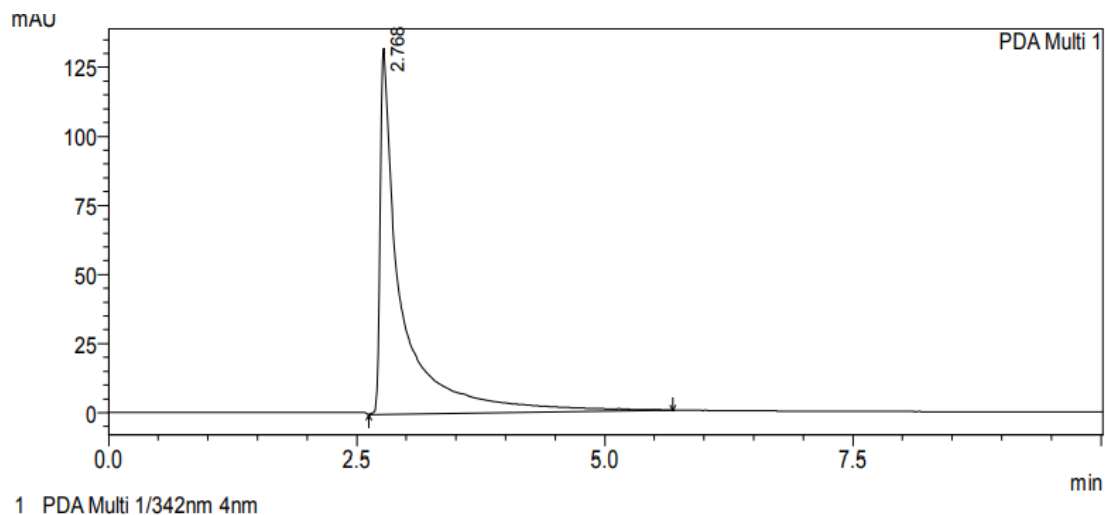

PeakTable

| PDA Ch1 342nm 4nm |           |         |        |         |          |
|-------------------|-----------|---------|--------|---------|----------|
| Peak#             | Ret. Time | Area    | Height | Area %  | Height % |
| 1                 | 2.768     | 1968344 | 132432 | 100.000 | 100.000  |
| Total             |           | 1968344 | 132432 | 100.000 | 100.000  |

**Figure S4** – Purity analysis of the compound LASSBio-1911 by HPLC. Samples analyzed at 347 nm. Isocratic mobile phase acetonitrile - acidified water (9:1) in 10 min at a flow rate of 1mL/min.
